# Supplementary material
Source: Springer Nature journal article supplement (https://www.springerprofessional.de/resource/supplementary/40008_2013_18_MOESM2_ESM.mos/11899454)
Supplement: MOESM2 [file 11899454]

! ******** triangulate_iot_cmp.mos ********
!
! Simultaneous triangulation of multiple input-output tables
!
! Usage 1:  mosel -c "exec triangulate_iot_cmp.mos"
!
!   The default names, cmp_iot.mdat and cmp_rank.csv, are used for
!   input- and output-data files.
!   Input-data file in the Xpress format contains four variables, "NSec",
!   "NTab", "A", and "Rank": "NSec" refers to the number of sectors,
!   "NTab" refers to the number of IOTs, "A" refers to an NSec-by-NSec-
!   by-NTab array of IOTs to be triangulated, and "Rank" refers to the
!   optimal ranking for individual triangulation.
!   Output-data file in the CSV format contains 2 * NTab + 1 columns:
!   the first column is the sequential numbers for sectors, the next
!   NTab columns are rankings by individual triangulation, and the last
!   NTab columns are rankings by simultaneous triangulation.
! 
! Usage 2:  mosel -c "exec triangulate_iot_cmp.mos ALPHA=a"
!
!   The value of "alpha" can be modified for solving MIP (15) instead of
!   MIP (14). "a" in the line above should be a number between 0 and 1.
!
! Usage 3:  mosel -c "exec triangulate_iot_cmp.mos IN_FILE='your_data.mdat', OUT_FILE='your_result.csv'"
!
!   Names of data files can be modified.
!
!
model "Simultaneous triangulation of multiple input-output tables"
  uses  "mmxprs";
  options explterm;
  
  parameters
    IN_FILE = "cmp_iot.mdat";
    OUT_FILE = "cmp_rank.csv";
    ALPHA = 1.00;
  end-parameters
  
  declarations
    NSec: integer;  ! Number of sectors
    NTab: integer;  ! Number of tables
  end-declarations
  
  initializations from IN_FILE
    NSec;
    NTab;
  end-initializations

  declarations
    SSec = 1 .. NSec;  ! Set (range) of sectors
    STab = 1 .. NTab;  ! Set (range) of tables
    A: array(SSec, SSec, STab) of real;   ! Matrix to be triangularized
    X: array(SSec, SSec, STab) of mpvar;  ! Decision variables
    Xo: array(SSec, SSec, STab) of real;  ! Optimal solutions
    Rank: array(SSec, STab) of real;     ! Individually optimal rankings
    RankCmp: array(SSec, STab) of real;  ! Simultaneously optimal rankings
    U: array(SSec, SSec, STab, STab) of mpvar;  ! Decision variables
    V: array(SSec, SSec, STab, STab) of mpvar;  ! Decision variables
    OptLowSum: array(STab) of real;  ! Optimal value
  end-declarations
  
  ! Loading data of input-output tables and optimal rankings
  initializations from IN_FILE
    A;
    Rank;
  end-initializations
  
  forall(s in STab)
    OptLowSum(s) := sum(i in SSec, j in SSec | Rank(i, s) > Rank(j, s)) A(i, j, s);
  
  ! Basic constraints
  forall(s in STab) do
    forall(i in SSec, j in SSec | i < j)  X(i, j, s) is_binary;
    forall(i in SSec, j in SSec | i < j, k in SSec | j < k) do
      X(i, j, s) + X(j, k, s) - X(i, k, s) >= 0;
      X(i, j, s) + X(j, k, s) - X(i, k, s) <= 1;
    end-do
  end-do
  
  ! Additional constraints 1
  !   Objective functions for triangularization problems
  forall(s in STab) do
    LowSum(s) := sum(i in SSec, j in SSec | i < j)
      ((A(i, j, s) - A(j, i, s)) * X(i, j, s) + A(j, i, s));
    LowSum(s) >= ALPHA * OptLowSum(s);
  end-do

  ! Additional constraints 2
  !   Defining the difference over years
  forall(s in STab, t in STab| s < t)
    forall(i in SSec, j in SSec | i < j)
      U(i, j, s, t) - V(i, j, s, t) = X(i, j, s) - X(i, j, t);
  
  ! Objective function
  TotalDiff := sum(i in SSec, j in SSec | i < j)
    sum(s in STab, t in STab | s < t) (U(i, j, s, t) + V(i, j, s, t));
  
  ! Solve
  minimize(TotalDiff);
  
  ! Write solutions
  forall(s in STab, i in SSec) do
    Xo(i, i, s) := 1;
    forall(j in SSec | i < j)  Xo(i, j, s) := getsol(X(i, j, s));
    forall(j in SSec | i > j)  Xo(i, j, s) := 1 - getsol(X(j, i, s));
    RankCmp(i, s) := sum(j in SSec) Xo(i, j, s);
  end-do
  
  fopen(OUT_FILE, F_OUTPUT);
  forall(i in SSec) do
    write(i);
    forall(s in STab) write(',', Rank(i, s));
    forall(s in STab) write(',', RankCmp(i, s));
    writeln('');
  end-do
  
  fclose(F_OUTPUT);
  
end-model
